# Supplementary material for: Characterizing first and third person viewpoints and their alternation for embodied interaction in virtual reality
Source: PubMed Central journal article supplement (PMC5744958; doi:10.1371/journal.pone.0190109), 2017-12-27
Supplement: pone.0190109.s005.pdf [file pone.0190109.s005.pdf]

## Supporting Information - S3 Fig.

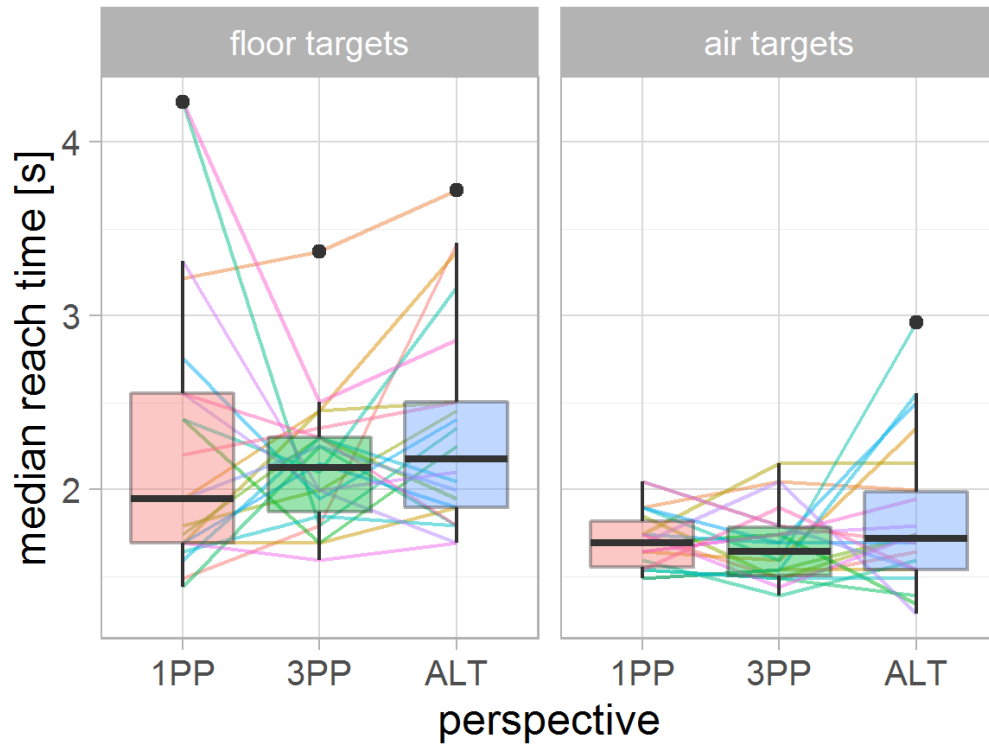

### Performance comparison of the reaching task (VMT group only).

The reaching performance was assessed with a two-way multiple comparisons ANOVA, with *Target position* (Ground vs. Air) and *Perspective* (1PP vs. 3PP vs. ALT) as the within subject variables. *Perspective* had no statistically significant effect on the time to reach targets ( $F_{2,42} = 1.59, p > .21$ ), suggesting a similar performance across the three perspective conditions. The median time to reach across the reaching trials in a session was used as the performance measure.
