# Supplementary material for: Characterizing first and third person viewpoints and their alternation for embodied interaction in virtual reality
Source: PubMed Central journal article supplement (PMC5744958; doi:10.1371/journal.pone.0190109), 2017-12-27
Supplement: pone.0190109.s006.pdf [file pone.0190109.s006.pdf]

## Supporting Information - S1 Table

**Summary of results:** Mean and confidence interval per experimental condition

| Response      | VMT                                                         |                                                             |                                                             | -VMT                                                        |                                                            |                                                             |
|---------------|-------------------------------------------------------------|-------------------------------------------------------------|-------------------------------------------------------------|-------------------------------------------------------------|------------------------------------------------------------|-------------------------------------------------------------|
|               | 1PP                                                         | 3PP                                                         | ALT                                                         | 1PP                                                         | 3PP                                                        | ALT                                                         |
| Agency        | $2.58 \pm \begin{smallmatrix} .22 \\ .23 \end{smallmatrix}$ | $2.40 \pm \begin{smallmatrix} .23 \\ .24 \end{smallmatrix}$ | $2.51 \pm \begin{smallmatrix} .23 \\ .25 \end{smallmatrix}$ | $1.40 \pm \begin{smallmatrix} .45 \\ .51 \end{smallmatrix}$ | $.14 \pm \begin{smallmatrix} .55 \\ .69 \end{smallmatrix}$ | $1.01 \pm \begin{smallmatrix} .40 \\ .46 \end{smallmatrix}$ |
| Ownership     | $1.5 \pm .41$                                               | $.79 \pm .56$                                               | $1.19 \pm .61$                                              | $1.44 \pm .35$                                              | $-.52 \pm .61$                                             | $.79 \pm .46$                                               |
| Self-location | $2.19 \pm .36$                                              | $.65 \pm .74$                                               | $1.48 \pm .55$                                              | $1.46 \pm .39$                                              | $-.04 \pm .65$                                             | $1.02 \pm .35$                                              |
| Threat        | $1.56 \pm .66$                                              | $-.25 \pm .78$                                              | $.54 \pm .87$                                               | $.58 \pm .58$                                               | $-.98 \pm .66$                                             | $.06 \pm .54$                                               |
| GSR           | $.57 \pm \begin{smallmatrix} .21 \\ .16 \end{smallmatrix}$  | $.35 \pm \begin{smallmatrix} .17 \\ .13 \end{smallmatrix}$  | $.45 \pm \begin{smallmatrix} .22 \\ .17 \end{smallmatrix}$  | $.38 \pm \begin{smallmatrix} .17 \\ .14 \end{smallmatrix}$  | $.26 \pm \begin{smallmatrix} .16 \\ .13 \end{smallmatrix}$ | $.39 \pm \begin{smallmatrix} .18 \\ .14 \end{smallmatrix}$  |

Mean score  $\pm$  the confidence interval.
