# Supplementary material for: Characterizing first and third person viewpoints and their alternation for embodied interaction in virtual reality
Source: PubMed Central journal article supplement (PMC5744958; doi:10.1371/journal.pone.0190109), 2017-12-27
Supplement: pone.0190109.s007.pdf [file pone.0190109.s007.pdf]

## Supporting Information - S2 Table

**Summary of statistical tests results and their respective effect size estimations.** Factors were examined using Mixed-design ANOVA and partial  $\eta^2$  for effect size. Significant factors with more than two levels were examined using pairwise t-tests and Cohen's d for effect size.

| Variable        | Multisensory congruence                                  | Perspective                                              | Interaction                                            |
|-----------------|----------------------------------------------------------|----------------------------------------------------------|--------------------------------------------------------|
| Agency          | $F_{1,36} = 98.0$ $\mathbf{p} < .001$ $\eta_p^2 = .73$   | $F_{2,72} = 8.71$ $\mathbf{p} < .001$ $\eta_p^2 = .20$   | $F_{2,72} = 3.37$ $\mathbf{p} < .050$ $\eta_p^2 = .09$ |
| Ownership       | $F_{1,36} = 4.49$ $\mathbf{p} < .042$ $\eta_p^2 = .11$   | $F_{2,72} = 22.8$ $\mathbf{p} < .001$ $\eta_p^2 = .39$   | $F_{2,72} = 5.22$ $\mathbf{p} < .008$ $\eta_p^2 = .13$ |
| Self-location   | $F_{1,36} = 4.31$ , $\mathbf{p} < .046$ $\eta_p^2 = .11$ | $F_{2,72} = 33.8$ , $\mathbf{p} < .001$ $\eta_p^2 = .48$ | $F_{2,72} = 0.30$ $p > .738$ $\eta_p^2 = .01$          |
| Threat          | $F_{1,36} = 3.35$ $p > .075$ $\eta_p^2 = .09$            | $F_{2,72} = 21.4$ $\mathbf{p} < .001$ $\eta_p^2 = .37$   | $F_{2,72} = 0.47$ $p > .627$ $\eta_p^2 = .01$          |
| More bodies     | $F_{1,36} = 3.84$ $p > .057$ $\eta_p^2 = .10$            | $F_{2,72} = 4.34$ $\mathbf{p} < .017$ $\eta_p^2 = .11$   | $F_{2,72} = 6.76$ $\mathbf{p} < .003$ $\eta_p^2 = .16$ |
| Turning Virtual | $F_{1,36} = 0.00$ $p > .946$ $\eta_p^2 = .00$            | $F_{2,72} = 16.4$ $\mathbf{p} < .001$ $\eta_p^2 = .31$   | $F_{2,72} = 0.74$ $p > .482$ $\eta_p^2 = .02$          |
| GSR             | $F_{1,38} = 1.12$ $p > .295$ $\eta_p^2 = .03$            | $F_{2,76} = 6.39$ $\mathbf{p} < .003$ $\eta_p^2 = .14$   | $F_{2,76} = 0.65$ $p > .525$ $\eta_p^2 = .02$          |
| MBD             | –                                                        | $F_{2,44} = 2.05$ $p > .141$ $\eta_p^2 = .09$            | –                                                      |

### Perspective post hoc

| Variable        | 1PP vs. 3PP                                    | 1PP vs. ALT                                    | 3PP vs. ALT                                    |
|-----------------|------------------------------------------------|------------------------------------------------|------------------------------------------------|
| Self-location   | $t_{72} = 6.66$ $\mathbf{p} < .001$ $d = 0.96$ | $t_{72} = 2.39$ $\mathbf{p} < .020$ $d = 0.35$ | $t_{72} = 4.27$ $\mathbf{p} < .001$ $d = 0.62$ |
| Threat          | $t_{72} = 6.54$ $\mathbf{p} < .001$ $d = 0.94$ | $t_{72} = 2.99$ $\mathbf{p} < .004$ $d = 0.43$ | $t_{72} = 3.55$ $\mathbf{p} < .002$ $d = 0.51$ |
| Turning virtual | $t_{72} = 5.25$ $\mathbf{p} < .001$ $d = 0.76$ | $t_{72} = 0.65$ $p > .519$ $d = 0.01$          | $t_{72} = 4.61$ $\mathbf{p} < .001$ $d = 0.65$ |
| GSR             | $t_{76} = 3.46$ $\mathbf{p} < .003$ $d = 0.50$ | $t_{76} = 0.97$ $p > .335$ $d = 0.14$          | $t_{76} = 2.49$ $\mathbf{p} > .030$ $d = 0.36$ |

### Interaction post hoc

| Variable    | 1PP vs. 3PP                                    | VMT                                   |                                       |
|-------------|------------------------------------------------|---------------------------------------|---------------------------------------|
|             |                                                | 1PP vs. ALT                           | 3PP vs. ALT                           |
| Agency      | $t_{72} = 1.11$ $p > .819$ $d = 0.23$          | $t_{72} = 0.42$ $p > .994$ $d = 0.09$ | $t_{72} = 0.68$ $p > .994$ $d = 0.14$ |
| Ownership   | $t_{72} = 2.50$ $p > .087$ $d = 0.52$          | $t_{72} = 1.10$ $p > .820$ $d = 0.23$ | $t_{72} = 1.40$ $p > .665$ $d = 0.29$ |
| More bodies | $t_{72} = 3.93$ $\mathbf{p} < .002$ $d = 0.80$ | $t_{72} = 2.50$ $p > .102$ $d = 0.51$ | $t_{72} = 1.43$ $p > .532$ $d = 0.29$ |

| Variable    | 1PP vs. 3PP                                    | -VMT                                  |                                                |
|-------------|------------------------------------------------|---------------------------------------|------------------------------------------------|
|             |                                                | 1PP vs. ALT                           | 3PP vs. ALT                                    |
| Agency      | $t_{72} = 4.72$ $\mathbf{p} < .001$ $d = 0.96$ | $t_{72} = 1.66$ $p > .409$ $d = 0.38$ | $t_{72} = 3.06$ $\mathbf{p} < .016$ $d = 0.63$ |
| Ownership   | $t_{72} = 6.92$ $\mathbf{p} < .001$ $d = 1.41$ | $t_{72} = 2.28$ $p > .127$ $d = 0.47$ | $t_{72} = 4.64$ $\mathbf{p} < .001$ $d = 0.95$ |
| More bodies | $t_{72} = 0.98$ $p > .532$ $d = 0.20$          | $t_{72} = 1.52$ $p > .532$ $d = 0.31$ | $t_{72} = 2.50$ $p > .102$ $d = 0.51$          |

| Variable    | 1PP                                               |                                                   | 3PP                                               |  | ALT          |  |
|-------------|---------------------------------------------------|---------------------------------------------------|---------------------------------------------------|--|--------------|--|
|             | VMT vs. -VMT                                      |                                                   | VMT vs. -VMT                                      |  | VMT vs. -VMT |  |
| Agency      | $t_{97,39} = 5.51$ $\mathbf{p} < .001$ $d = 1.12$ | $t_{97,39} = 8.67$ $\mathbf{p} < .001$ $d = 1.77$ | $t_{97,39} = 6.59$ $\mathbf{p} < .001$ $d = 1.35$ |  |              |  |
| Ownership   | $t_{82,97} = 0.17$ $p > .863$ $d = 0.04$          | $t_{82,97} = 3.63$ $\mathbf{p} < .004$ $d = 0.74$ | $t_{82,97} = 1.09$ $p > .820$ $d = 0.22$          |  |              |  |
| More bodies | $t_{99,14} = 3.10$ $\mathbf{p} < .021$ $d = 0.63$ | $t_{99,14} = 1.27$ $p > .532$ $d = 0.26$          | $t_{99,14} = 2.22$ $p > .142$ $d = 0.45$          |  |              |  |
